# Supplementary material
Source: bioRxiv or medRxiv preprint supplement (https://www.biorxiv.org/highwire/filestream/24286/field_highwire_adjunct_files/2/028324-3.pdf)
Supplement: Supplementary file [file 028324-3.pdf]

**Supp Table 2.** Primer pairs used in this study.

| Primer pair | Primer name        | Primer sequence (5'->3')                                          | PCR Conditions                                                                              |
|-------------|--------------------|-------------------------------------------------------------------|---------------------------------------------------------------------------------------------|
| A           | Cox2MT<br>ORF1C_3' | GCYATTGGATATCAATGATATTGRAARTAYG<br>GTAAAGAGCTGCTGGTCTATAA         | 95°(5')  94° (1') 56°(45'') 68° (2') <30c> 68°(5') 4°                                       |
| B           | Cox2_5<br>ORF1P-3' | Belloch C <i>et al.</i> 2000<br>TRTAAACTGGCAGGTACATRTCC           | 95°(5')  94° (1') 50°->54°(45'') 68° (2') <35c> 68°(5') 4°                                  |
| C           | Cox2MT<br>ORFD7Y_3 | GCYATTGGATATCAATGATATTGRAARTAYG<br>TATAACYTTATTATTAAYTTTATGTAAACC | 95°(5')  94° (1') 50°->54°(45'') 68° (2') <35c> 68°(5') 4°                                  |
| D/D*        | ORF1I_5<br>ORF1I_3 | GTTTWTRAAGCTGAAGGTTTC<br>CATTACCRTTTTTAAYATATTTAGC                | 95°(5')  94° (1') 51°/49°(45'') 68° (2') <30c> 68°(5') 4°                                   |
| E           | Cox3d<br>Cox3r     | TTTTRTGATTTMGAGATATTGTWGC<br>ACTACGTATAAAAAATAATCAYATWAC          | 95°(1')  94° (30'') 40°(35'') 68° (2') <10c> 94° (30'') 45°(35'') 68° (2') <20c> 72°(5') 4° |
| F           | Cox3dkp<br>Cox3rkp | TTTTATGATTTAGAGATATTGTATC<br>ACWACGTATAAAAAATAATCAGATAAC          | 95°(1')  94° (30'') 40°(35'') 68° (2') <10c> 94° (30'') 45°(35'') 68° (2') <20c> 72°(5') 4° |
